# Supplementary material for: The neuroprotection of deproteinized calf blood extractives injection against Alzheimer's disease via regulation of Nrf-2 signaling
Source: Aging (Albany NY). 2021 Mar 26;13(8):11150–69. doi: 10.18632/aging.202776 (PMC8109110; doi:10.18632/aging.202776)
Supplement: Supplementary Figures [file aging-13-202776-s001.pdf]

## SUPPLEMENTARY FIGURES

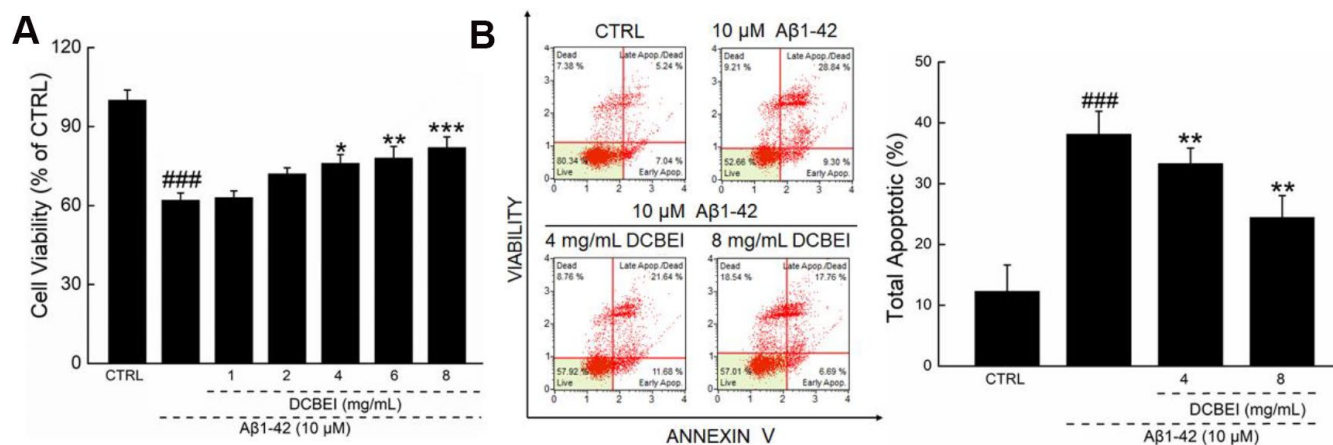

**Supplementary Figure 1. DCBEI protects U251 cells against A $\beta$ <sub>1-42</sub>-induced damage.** U251 cells were pre-incubated with DCBEI (4 mg/mL to 8 mg/mL) for 3 h, and co-treated with A $\beta$ <sub>1-42</sub> for a further 24 h. (A) DCBEI increased cell viability. (B) DCBEI inhibited apoptosis. Data are expressed as a percentage of corresponding control cells and means  $\pm$  S.D. (n = 6). ###  $P < 0.001$  vs. CTRL, \*  $P < 0.05$ , \*  $P < 0.01$  and \*\*\*  $P < 0.001$  vs. A $\beta$ <sub>1-42</sub>-treated cells.

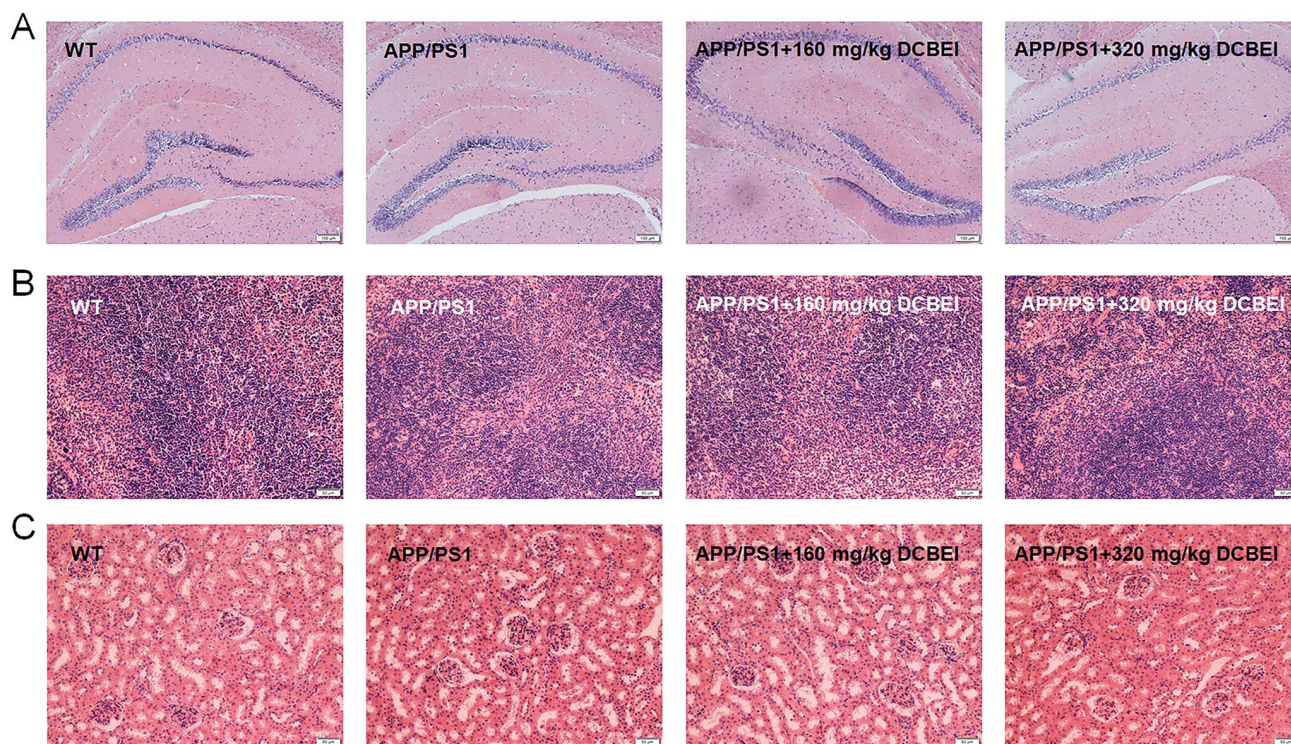

**Supplementary Figure 2. Histopathological analysis via hematoxylin and eosin (H&E) staining.** No significant changes on (A) brain tissues (100 $\times$ ) (Scale bar: 100  $\mu$ m), (B) spleen tissues (200 $\times$ ) (Scale bar: 50  $\mu$ m) and (C) kidney tissues (200 $\times$ ) (scale bar: 50  $\mu$ m) were noted among all experimental groups including WT, APP/PS1, and DCBEI-treated APP/PS1 mice (n=3).

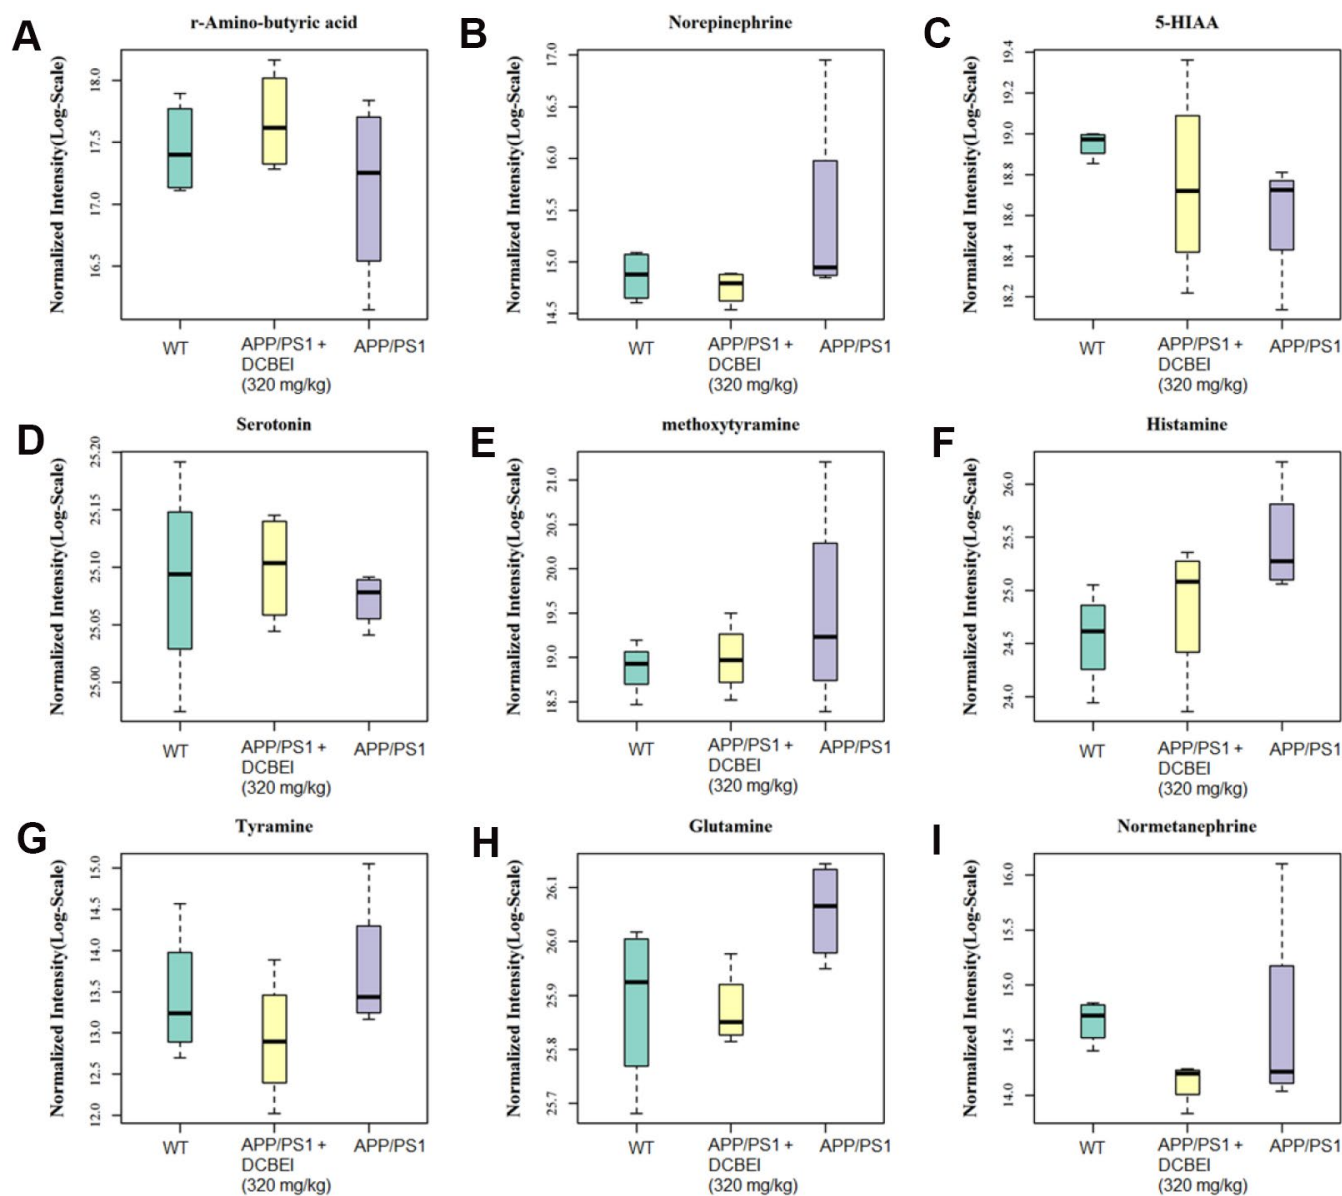

**Supplementary Figure 3.** DCBEI regulates neurotransmitter levels in serum analyzing by metabonomics via LC-MS/MS in APP/PS1 mice (n=3) including (A) r-amino-butyric acid, (B) norepinephrine, (C) 5-HIAA, (D) serotonin, (E) methoxytyramine, (F) histamine, (G) tyramine, (H) glutamine, and (I) normetanephrine.

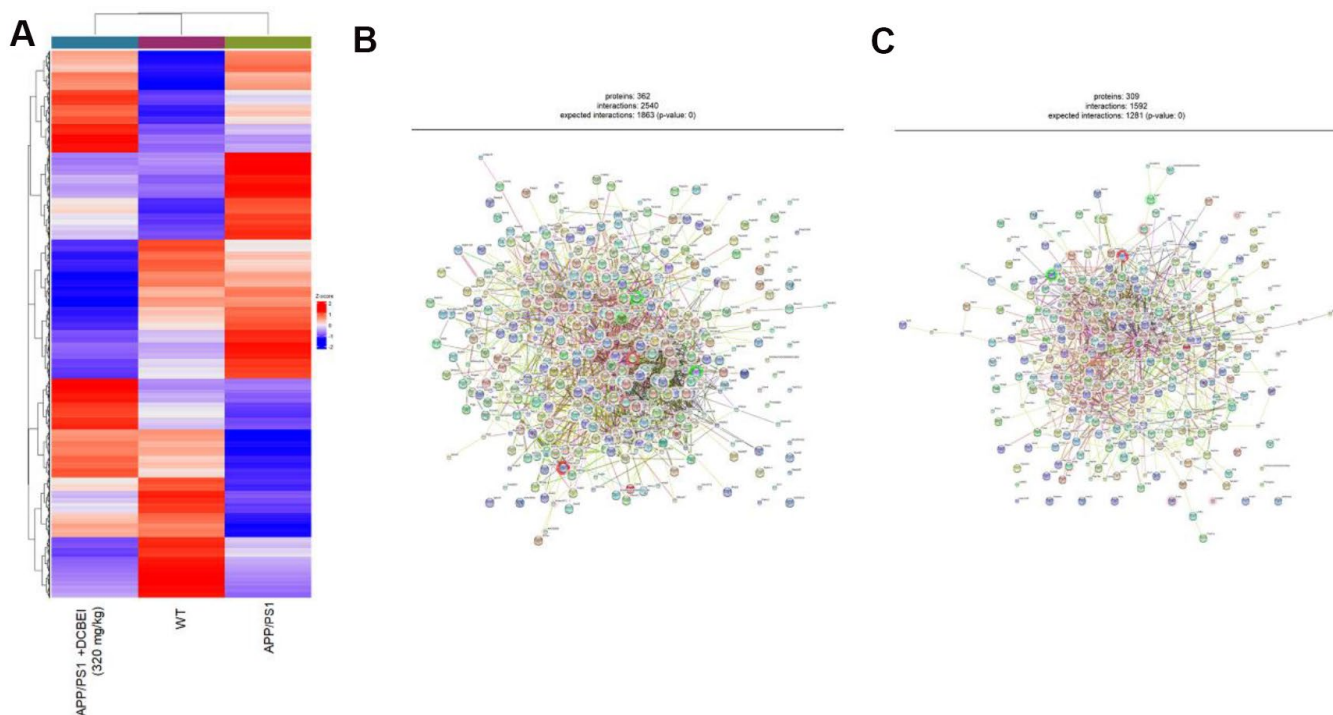

**Supplementary Figure 4. DCBEI broadly regulates protein expression analyzing by proteomics.** (A) The list of differentially expressed proteins among each experimental group. Protein-protein interaction network of (B) WT vs. APP/PS1 group and (C) APP/PS1 vs. DCBEI group analysis via STRINGdb.

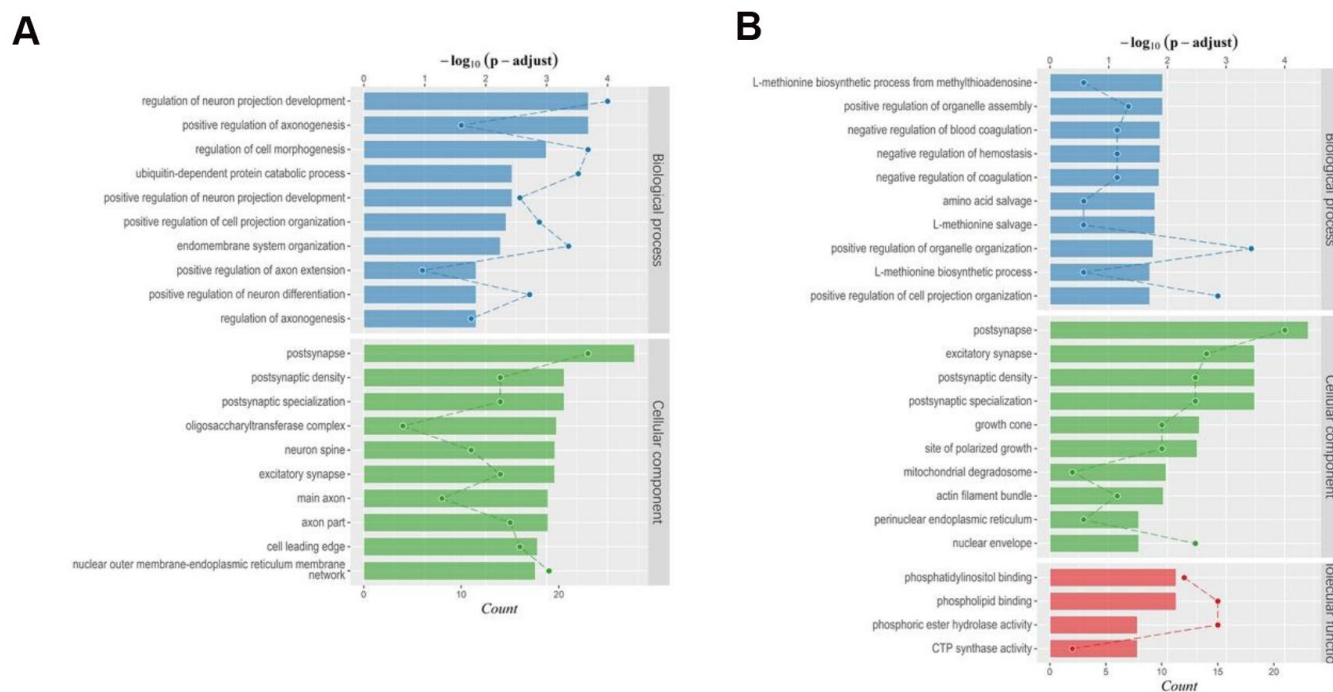

**Supplementary Figure 5. GO enrichment analysis of (A) WT vs. APP/PS1 group and (B) APP/PS1 vs. DCBEI group.**
